# Supplementary material for: Semen analysis and reproductive hormones in boys with classical Hodgkin lymphoma treated according to the EuroNet-PHL-C2 protocol
Source: PubMed Central journal article supplement — Hum Reprod. 2024 Sep 10;39(11):2411–22. doi: 10.1093/humrep/deae204 (PMC11532607; doi:10.1093/humrep/deae204), 2024-09-10
Supplement: deae204_supplementary_figure_s1.pdf [file deae204_supplementary_figure_s1.pdf]

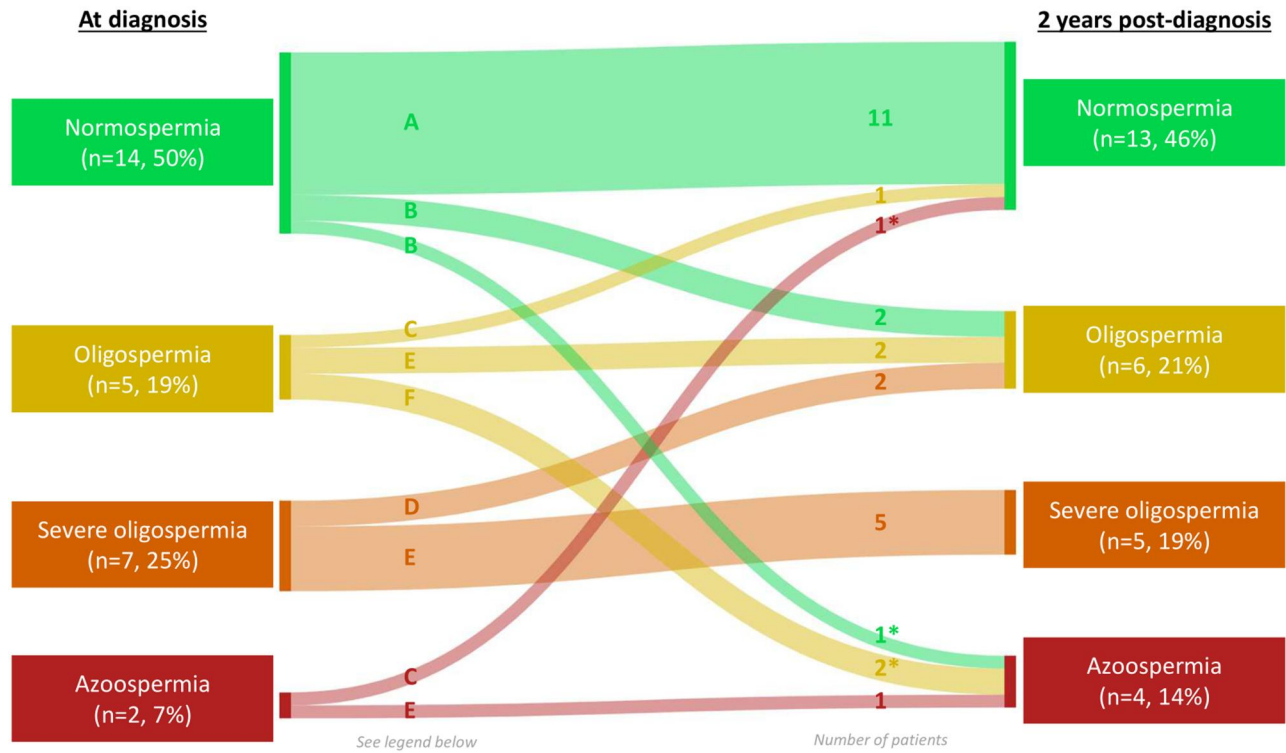

| Letter in figure | Semen concentration at diagnosis | Recovery or decreased sperm concentration after 2 years? | Number of patients | Assigned treatment level and consolidation treatment scheme                                     |
|------------------|----------------------------------|----------------------------------------------------------|--------------------|-------------------------------------------------------------------------------------------------|
| A                | Normospermia                     | Remained normospermic                                    | 11/14 (79%)        | n=3 TL1<br>n=2 TL2-COPDAC-28<br>n=2 TL2-DECOPDAC-21<br>n=3 TL3-COPDAC-28<br>n=1 TL3-DECOPDAC-21 |
| B                |                                  | Decreased sperm concentration                            | 3/14 (21%)         | n=1 TL3-COPDAC-28<br>n=1 TL3-COPDAC-28 + pelvic RT<br>n=1 TL3-DECOPDAC-21                       |
| C                | Oligo/azoospermia                | Full recovery                                            | 2/14 (14%)         | n=1 TL2-DECOPDAC-21<br>n=1 TL3-COPDAC-28 + pelvic RT                                            |
| D                |                                  | Partial recovery                                         | 2/14 (14%)         | n=1 TL2-DECOPDAC-21<br>n=1 TL3-COPDAC-28                                                        |
| E                |                                  | No recovery                                              | 8/14 (57%)         | n=1 TL2-COPDAC-28<br>n=1 TL2-DECOPDAC-21<br>n=2 TL3-COPDAC-28<br>n=4 TL3-DECOPDAC-21            |
| F                |                                  | Decreased sperm concentration                            | 2/14 (14%)         | n=1 TL2-COPDAC-28 + pelvic RT<br>n=1 TL3-DECOPDAC-21                                            |

**Supplementary Figure S1. Boys who delivered semen at diagnosis and 2 years post-diagnosis, a comparison of sperm concentration over time in 28 patients treated for childhood Hodgkin lymphoma.** TL, treatment level; RT, radiotherapy. Applied references values for semen analysis are according to WHO criteria (Cooper et al., 2010). Normospermia refers to  $\geq 15$  mil sperm count; oligospermia 5–15 mil/ml, severe oligospermia 0–5 mil/ml, and azoospermia 0 sperm cells. Three patients marked with an asterisk (\*) received pelvic radiotherapy as part of their cHL treatment. None of the boys were irradiated in the inguinal or testicular area, expected radiation directed towards the testes was  $<0.5$ –1 Gy. Figure generated via <https://sankeymatic.com/>.
