# Supplementary material for: Semen analysis and reproductive hormones in boys with classical Hodgkin lymphoma treated according to the EuroNet-PHL-C2 protocol
Source: PubMed Central journal article supplement — Hum Reprod. 2024 Sep 10;39(11):2411–22. doi: 10.1093/humrep/deae204 (PMC11532607; doi:10.1093/humrep/deae204), 2024-09-10
Supplement: deae204_supplementary_table_s1.pdf [file deae204_supplementary_table_s1.pdf]

**Supplementary Table S1.** Semen parameters and serum reproductive markers in boys diagnosed with classical Hodgkin lymphoma who presented with and without B symptoms at diagnosis.

|                                              |              | B symptoms at diagnosis | No B symptoms at diagnosis | P-value |
|----------------------------------------------|--------------|-------------------------|----------------------------|---------|
| <b>(POST)PUBERTAL BOYS</b>                   |              |                         |                            |         |
| <b>Sperm parameters at diagnosis</b>         |              |                         |                            |         |
| Sperm volume (ml)                            |              | n = 21                  | n = 27                     |         |
|                                              | Median (IQR) | 0.7 [0.5; 2.0]          | 1.5 [0.8; 2.1]             |         |
|                                              | β (95% CI)   | −0.3 [1.0; 0.5]         | Ref.                       | 0.50    |
| Sperm motility (a + b%, per ml)              | Median (IQR) | 13.0 [0.0; 41.0]        | 34.0 [22.5; 51.2]          |         |
|                                              | β (95% CI)   | −12.7 [−26.3; 0.9]      | Ref.                       | 0.07    |
| Sperm concentration (10 <sup>6</sup> per ml) | Median (IQR) | 7.6 [1.0; 13.6]         | 30.0 [10.9; 68.5]          |         |
|                                              | β (95% CI)   | −27.4 [−52.5; −2.3]     | Ref.                       | 0.03    |
| Abnormal sperm concentration (<15 mil/ml)    | n (%)        | 16 (76.2%)              | 7 (25.9%)                  |         |
|                                              | OR (95% CI)  | 2.3 [1.0; 3.8]          | Ref.                       | 0.001   |
| Total motile sperm count                     | Median (IQR) | 1.5 [0.0; 8.3]          | 19.2 [3.4; 33.7]           |         |
|                                              | β (95% CI)   | −18.7 [−38.3; 0.9]      | Ref.                       | 0.06    |
| <b>Laboratory measurements at diagnosis</b>  |              |                         |                            |         |
| FSH (IU/l)                                   |              | n = 29                  | n = 39                     |         |
|                                              | Median (IQR) | 4.3 [2.4; 5.8]          | 3.1 [1.4; 4.9]             |         |
|                                              | β (95% CI)   | 1.2 [−0.3; 2.7]         | Ref.                       | 0.12    |
| Elevated FSH (>7.6 IU/l)                     | n (%)        | 6 (20.7%)               | 4 (10.3%)                  |         |
|                                              | OR (95% CI)  | 2.4 [0.6; 10.9]         | Ref.                       | 0.23    |
| Inhibin B (ng/l)                             | Median (IQR) | 157.0 [124.0; 202.0]    | 171.0 [137.5; 237.0]       |         |
|                                              | β (95% CI)   | −31.8 [−68.3; 4.8]      | Ref.                       | 0.09    |
| Low inhibin B (<100 ng/l)                    | n (%)        | 5 (17.2%)               | 3 (7.7%)                   |         |
|                                              | OR (95% CI)  | 2.5 (0.6; 13.0)         | Ref.                       | 0.25    |
| Inhibin B:FSH ratio                          | Median (IQR) | 46.8 [18.3; 86.2]       | 54.6 [28.1; 159.8]         |         |
|                                              | β (95% CI)   | −37.9 [−89.8; 14.0]     | Ref.                       | 0.15    |
| <b>PRE-PUBERTAL BOYS</b>                     |              |                         |                            |         |
| <b>Laboratory measurements at diagnosis</b>  |              |                         |                            |         |
| FSH (IU/l)                                   |              | n = 11                  | n = 15                     |         |
|                                              | Median (IQR) | 0.6 [0.2; 0.8]          | 0.5 [0.3; 1.1]             |         |
|                                              | β (95% CI)   | −0.3 [−0.9; 0.2]        | Ref.                       | 0.19    |
| Elevated FSH (>5 IU/l)                       | n (%)        | 0 (%)                   | 0 (0.0%)                   |         |
|                                              | OR (95% CI)  | –                       | –                          | –       |
| Inhibin B (ng/l)                             | Median (IQR) | 81.0 [73.0; 105.5]      | 106.0 [75.5; 126.5]        |         |
|                                              | β (95% CI)   | −12.1 [−39.3; 15.1]     | Ref.                       | 0.39    |
| Low inhibin B (<50 ng/l)                     | n (%)        | 2 (18.2%)               | 1 (6.7%)                   |         |
|                                              | OR (95% CI)  | 4.1 (0.3; 126.7)        | Ref.                       | 0.33    |
| Inhibin B:FSH ratio                          | Median (IQR) | 128.9 [121.2; 448.3]    | 126.7 [78.3; 370.3]        |         |
|                                              | β (95% CI)   | 132.8 [−142.4; 408.0]   | Ref.                       | 0.33    |

FSH, follicle-stimulating hormone; IQR, interquartile range; CI, confidence interval; OR, odds ratio; Ref, reference.

P-values were calculated using linear regression analyses (continuous) or logistic regression analysis, adjusted for age at time of (serum/sperm)sampling. B symptoms at diagnosis included drenching night sweats, unexplained fever >38.5°C and/or ≥10% weight loss in the previous 6 months. Abnormal sperm concentration was defined as sperm concentration <15 mil/ml according to WHO criteria (Cooper et al., 2010).
