# Supplementary material for: Semen analysis and reproductive hormones in boys with classical Hodgkin lymphoma treated according to the EuroNet-PHL-C2 protocol
Source: PubMed Central journal article supplement — Hum Reprod. 2024 Sep 10;39(11):2411–22. doi: 10.1093/humrep/deae204 (PMC11532607; doi:10.1093/humrep/deae204), 2024-09-10
Supplement: deae204_supplementary_table_s2.pdf [file deae204_supplementary_table_s2.pdf]

**Supplementary Table S2.** Serum reproductive markers and semen parameters per treatment level, at diagnosis and after 2 years in (post) pubertal boys.

|                                                           | Treatment level and scheme |                      |                      |                      |                      | Comparisons          |                                                |
|-----------------------------------------------------------|----------------------------|----------------------|----------------------|----------------------|----------------------|----------------------|------------------------------------------------|
|                                                           | TL1                        | TL2 COPDAC-28        | TL2 DECOPDAC-21      | TL3 COPDAC-28        | TL3 DECOPDAC-21      | TL2 vs TL3 (P-value) | TL2/3 COPDAC-28 vs TL2/3 DECOPDAC-21 (P-value) |
| <b>(POST)PUBERTAL BOYS</b>                                |                            |                      |                      |                      |                      |                      |                                                |
| Sperm parameters at diagnosis                             | n = 3                      | n = 11               | n = 10               | n = 16               | n = 8                |                      |                                                |
| Sperm volume (ml)                                         | 1.6 [1.6; 1.8]             | 1.0 [0.9; 1.9]       | 1.1 [0.4; 2.2]       | 1.1 [0.6; 2.2]       | 0.8 [0.6; 1.6]       | 0.91                 | 0.42                                           |
| Progressive sperm motility (A + B%)                       | 71.0 [54.5; 75.0]          | 38.0 [33.0; 52.2]    | 31.5 [21.2; 45.5]    | 22.5 [6.5; 43.0]     | 6.6 [2.2; 19.5]      | 0.01                 | 0.21                                           |
| Sperm concentration (mil/ml)                              | 30.0 [30.0; 60.0]          | 29.0 [11.8; 74.5]    | 12.5 [4.8; 36.1]     | 14.0 [0.2; 37.0]     | 2.3 [1.5; 14.5]      | 0.04                 | 0.37                                           |
| Abnormal sperm concentration (<15 ml/ml)                  | 0 (0.0%)                   | 4 (36.4%)            | 5 (50.0%)            | 8 (50.0%)            | 6 (75.0%)            | 0.46                 | 0.43                                           |
| Total motile sperm count (mil)                            | 35.5 [34.8; 52.0]          | 13.9 [8.2; 32.9]     | 4.4 [0.3; 16.9]      | 7.0 [0.1; 26.5]      | 0.2 [<0.1; 5.5]      | 0.077                | 0.12                                           |
| Laboratory measurements at diagnosis                      | n = 10                     | n = 16               | n = 11               | n = 20               | n = 11               |                      |                                                |
| FSH (IU/l)                                                | 2.0 [1.3; 3.9]             | 2.8 [1.6; 5.6]       | 3.1 [2.2; 4.7]       | 4.4 [2.6; 8.0]       | 4.3 [1.3; 5.9]       | 0.21                 | 0.45                                           |
| Elevated FSH (>7.6 IU/l)                                  | 0 (0.0%)                   | 2 (12.5%)            | 1 (9.1%)             | 7 (35.0%)            | 0 (0.0%)             | 0.31                 | 0.07                                           |
| Inhibin B (ng/l)                                          | 170.0 [146.0; 236.5]       | 175.0 [125.0; 197.0] | 186.0 [140.5; 263.5] | 140.0 [120.0; 203.0] | 175.0 [146.5; 204.5] | 0.24                 | 0.24                                           |
| Decreased inhibin B (<100 ng/l)                           | 1 (10.0%)                  | 1 (6.2%)             | 1 (9.1%)             | 4 (20.0%)            | 1 (9.1%)             | 0.43                 | 0.70                                           |
| Inhibin B:FSH ratio                                       | 75.0 [50.3; 140.9]         | 69.3 [22.3; 182.2]   | 60.0 [39.4; 114.3]   | 35.6 [13.9; 59.6]    | 45.8 [25.3; 119.9]   | 0.17                 | 0.44                                           |
| Laboratory measurements after completion of chemotherapy* | n = 9                      | n = 14               | n = 11               | n = 21               | n = 12               |                      |                                                |
| FSH (IU/l)                                                | 4.8 [3.2; 12.2]            | 6.0 [3.7; 12.2]      | 9.2 [4.8; 10.0]      | 10.0 [5.0; 15.0]     | 9.8 [7.1; 11.8]      | 0.05                 | 0.83                                           |
| Elevated FSH (>7.6 IU/l)                                  | 3 (33.3%)                  | 6 (42.9%)            | 7 (63.6%)            | 14 (66.7%)           | 8 (66.7%)            | 0.39                 | 0.73                                           |
| Inhibin B (ng/l)                                          | 141.0 [76.0; 160.0]        | 161.5 [95.0; 203.0]  | 75.0 [62.5; 162.0]   | 86.0 [48.0; 124.0]   | 81.0 [58.0; 97.2]    | 0.05                 | 0.27                                           |
| Decreased inhibin B (<100 ng/l)                           | 3 (33.3%)                  | 4 (28.6%)            | 6 (54.5%)            | 14 (66.7%)           | 9 (75.0%)            | 0.05                 | 0.44                                           |
| Inhibin B:FSH ratio                                       | 23.5 [10.9; 48.1]          | 21.2 [9.1; 58.4]     | 12.7 [6.7; 21.0]     | 8.0 [2.7; 20.4]      | 6.8 [4.3; 13.8]      | 0.04                 | 0.53                                           |
| Sperm parameters at 2 years post-diagnosis                | n = 3                      | n = 5                | n = 6                | n = 9                | n = 8                |                      |                                                |
| Sperm volume (ml)                                         | 1.0 [1.0; 2.4]             | 1.8 [1.6; 2.1]       | 1.9 [0.7; 2.2]       | 1.7 [1.5; 3.2]       | 3.0 [1.7; 4.3]       | 0.34                 | 0.52                                           |
| Progressive sperm motility (A + B%)                       | 70.0 [60.0; 82.0]          | 48.0 [47.0; 48.0]    | 47.0 [28.0; 58.5]    | 54.0 [15.0; 60.9]    | 16.5 [0.0; 51.2]     | 0.81                 | 0.46                                           |
| Sperm concentration (mil/ml)                              | 44.8 [32.0; 65.4]          | 20.0 [13.0; 21.0]    | 29.0 [7.9; 49.8]     | 13.0 [5.6; 18.0]     | 1.4 [<0.1; 5.3]      | 0.07                 | 0.31                                           |
| Abnormal sperm concentration (<15 ml/ml)                  | 0 (0.0%)                   | 2 (40.0%)            | 2 (33.3%)            | 5 (55.6%)            | 7 (87.5%)            | 0.12                 | 0.70                                           |
| Total motile sperm count (mil)                            | 42.1 [27.8; 100.6]         | 16.6 [16.1; 16.9]    | 5.6 [1.7; 40.9]      | 10.8 [1.0; 17.0]     | 0.9 [0.0; 15.7]      | 0.33                 | 0.29                                           |
| Laboratory measurements at 2 years post-diagnosis         | n = 8                      | n = 14               | n = 8                | n = 19               | n = 10               |                      |                                                |
| FSH (IU/l)                                                | 4.8 [2.6; 5.7]             | 2.9 [1.6; 5.5]       | 2.8 [1.4; 4.5]       | 4.0 [3.1; 5.7]       | 5.8 [4.6; 11.6]      | 0.02                 | 0.36                                           |
| Elevated FSH (>7.6 IU/l)                                  | 0 (0.0%)                   | 2 (14.3%)            | 2 (25.0%)            | 2 (10.5%)            | 3 (30.0%)            | 1.000                | 0.25                                           |
| Inhibin B (ng/l)                                          | 154.0 [126.0; 189.0]       | 181.5 [123.2; 253.0] | 192.0 [148.8; 249.8] | 157.0 [108.0; 188.5] | 101.0 [69.0; 127.0]  | 0.02                 | 0.35                                           |
| Decreased inhibin B (<100 ng/l)                           | 1 (12.5%)                  | 3 (21.4%)            | 1 (12.5%)            | 3 (15.8%)            | 5 (50.0%)            | 0.65                 | 0.30                                           |
| Inhibin B:FSH ratio                                       | 38.3 [21.8; 69.3]          | 45.8 [30.7; 161.3]   | 67.9 [50.4; 159.6]   | 28.4 [23.2; 63.2]    | 18.8 [6.9; 27.2]     | 0.01                 | 0.31                                           |

FSH, follicle-stimulating hormone; vs, versus. Results are presented as median (IQR) or number (%). P-values were calculated by Mann-Whitney U-tests (continuous) or chi-square/Fisher's exact (categorical).

Abnormal sperm concentration is defined as sperm count <15 mil/ml in line with WHO criteria (Cooper et al., 2010).

\* Timing of last checkup during treatment depended on assigned TL-stage, i.e. TL1 patients either had their last checkup during treatment at time of T1 (after 2x OEPA (in case of inadequate response)) or T1b (after 1x COPDAC-28 (in case of adequate response)), TL2 patients had their last checkup during treatment at time of T2 checkup (after 2x (DECOPDAC)) and TL3 patients had their last checkup during treatment at time of T3 checkup (after 4x (DE)COPDAC).
