# Supplementary material for: Semen analysis and reproductive hormones in boys with classical Hodgkin lymphoma treated according to the EuroNet-PHL-C2 protocol
Source: PubMed Central journal article supplement — Hum Reprod. 2024 Sep 10;39(11):2411–22. doi: 10.1093/humrep/deae204 (PMC11532607; doi:10.1093/humrep/deae204), 2024-09-10
Supplement: deae204_supplementary_table_s3.pdf [file deae204_supplementary_table_s3.pdf]

**Supplementary Table S3.** Results of the linear mixed models performed on laboratory measurements in (post)pubertal boys from diagnosis up to 2 years post-treatment.

|                                       | Including all available samples of                |                                                 | Additional analyses including samples obtained from boys who were (post)pubertal at time of diagnosis |                                        |                                       |                      |                                        |                                        |                                    |  |
|---------------------------------------|---------------------------------------------------|-------------------------------------------------|-------------------------------------------------------------------------------------------------------|----------------------------------------|---------------------------------------|----------------------|----------------------------------------|----------------------------------------|------------------------------------|--|
|                                       | Boys who were (post)pubertal at time of diagnosis | Boys who were pre-pubertal at time of diagnosis | Treatment level                                                                                       |                                        |                                       |                      | Treatment scheme                       |                                        |                                    |  |
|                                       |                                                   |                                                 | TL1                                                                                                   | TL2                                    | TL3                                   | TL2 vs TL3 (P-value) | TL2/3 COPDAC-28 arm                    | TL2/3 DECOPDAC-21 arm                  | COPDAC-28 vs DECOPDAC-21 (P-value) |  |
| <b>FSH</b>                            |                                                   |                                                 |                                                                                                       |                                        |                                       |                      |                                        |                                        |                                    |  |
| Intercept:                            | -1.7 (-8.6; 5.2)                                  | -2.1 (-3.3; 1.0)                                | -2.6 (-9.9; 4.7)                                                                                      | -2.8 (-9.9; 4.3)                       | -1.0 (-8.0; 6.1)                      | 0.43                 | -0.5 (-8.8; 7.7)                       | -0.1 (-8.9; 8.6)                       | 0.81                               |  |
| T0: at diagnosis                      |                                                   |                                                 |                                                                                                       |                                        |                                       |                      |                                        |                                        |                                    |  |
| T1: after 2xOEPA                      | 5.2 (4.1; 6.4),<br>P < 0.001                      | 0.1 (-0.7; 0.8),<br>P = 0.86                    | 5.1 (2.1; 8.1),<br>P = 0.001                                                                          | 4.1 (2.4; 5.9),<br>P < 0.001           | 6.2 (4.5; 7.9),<br>P < 0.001          | 0.06                 | 6.0 (4.6; 7.5),<br>P < 0.001           | 3.8 (1.8; 5.7),<br>P < 0.001           | 0.80                               |  |
| T1b/T2: after 1x COPDAC/2x (DE)COPDAC | 4.9 (3.7; 6.0),<br>P < 0.001                      | 1.0 (0.2; 1.7),<br>P = 0.01                     | 5.4 (2.2; 8.5),<br>P < 0.001                                                                          | 4.1 (2.3; 6.0),<br>P < 0.001           | 5.3 (3.6; 7.0),<br>P < 0.001          | 0.15                 | 5.4 (3.9; 6.9),<br>P < 0.001           | 3.8 (1.9; 5.7),<br>P < 0.001           | 0.91                               |  |
| T3: after 4x (DE)COPDAC               | 5.5 (4.1; 7.0),<br>P < 0.001                      | 0.7 (-0.2; 1.5),<br>P = 0.12                    | -                                                                                                     | -                                      | 5.8 (4.2; 7.4),<br>P < 0.001          | -                    | 5.9 (4.1; 7.7),<br>P < 0.001           | 4.8 (2.4; 7.1),<br>P < 0.001           | 0.57                               |  |
| T4: 2yPD                              | 0.9 (-0.4; 2.3),<br>P = 0.18                      | 1.5 (0.7; 2.2),<br>P < 0.001                    | 0.8 (-2.5; 4.0),<br>P = 0.63                                                                          | 0.4 (-1.7; 2.4),<br>P = 0.74           | 1.4 (-0.5; 3.2),<br>P = 0.14          | 0.13                 | 1.0 (-0.8; 2.7),<br>P = 0.28           | 1.4 (-0.8; 3.6),<br>P = 0.22           | 0.42                               |  |
| <b>Inhibin B</b>                      |                                                   |                                                 |                                                                                                       |                                        |                                       |                      |                                        |                                        |                                    |  |
| Intercept:                            | 185.0                                             | 68.1                                            | 194.0                                                                                                 | 214.6                                  | 162.2                                 | 0.05                 | 184.2                                  | 205.4                                  | 0.31                               |  |
| T0: at diagnosis                      | (86.7; 283.2)                                     | (22.7; 116.7)                                   | (90.2; 297.9)                                                                                         | (115.0; 314.3)                         | (62.6; 261.9)                         |                      | (64.7; 303.8)                          | (79.2; 331.6)                          |                                    |  |
| T1: after 2xOEPA                      | -39.8<br>(-56.4; -23.2),<br>P < 0.001             | 6.3<br>(-11.9; 24.4),<br>P = 0.52               | -65.1<br>(-109.4; -20.9),<br>P = 0.004                                                                | -36.8<br>(-63.0; -10.7),<br>P = 0.006  | -35.0<br>(-59.4; -10.6),<br>P = 0.005 | 0.06                 | -33.9<br>(-56.8; -11.1),<br>P = 0.004  | -38.5<br>(-68.5; -8.5),<br>P = 0.012   | 0.42                               |  |
| T1b/T2: after 1x COPDAC/2x (DE)COPDAC | -57.2<br>(-73.9; -40.5),<br>P < 0.001             | 17.6<br>(-0.8; 36.0),<br>P = 0.08               | -60.9<br>(-105.1; -16.6),<br>P = 0.007                                                                | -63.3<br>(-90.1; -36.4),<br>P < 0.001  | -50.9<br>(-75.2; -26.6),<br>P < 0.001 | 0.16                 | -42.2<br>(-65.7; 18.7),<br>P < 0.001   | -79.1<br>(108.5; -49.8),<br>P < 0.001  | 0.53                               |  |
| T3: after 4x (DE)COPDAC               | -65.7<br>(-87.0; -44.4),<br>P < 0.001             | 14.2<br>(-7.8; 35.1),<br>P = 0.22               | -                                                                                                     | -                                      | -62.1<br>(-85.8; -38.5),<br>P < 0.001 | -                    | -50.8<br>(-78.6; -23.0),<br>P < 0.001  | -87.7<br>(-124.1; -51.2),<br>P < 0.001 | 0.80                               |  |
| T4: 2yPD                              | -19.0<br>(-39.0; 0.9),<br>P = 0.06                | 43.4<br>(16.4; 58.7),<br>P < 0.001              | -14.5<br>(-61.6; 32.7),<br>P = 0.55                                                                   | -6.5<br>(-36.3; 23.3),<br>P = 0.67     | -28.8<br>(-55.3; -2.3),<br>P = 0.03   | 0.004                | -5.4<br>(-32.0; 21.1),<br>P = 0.69     | 41.7<br>(-75.5; -7.9),<br>P = 0.016    | 0.87                               |  |
| <b>Inhibin B:FSH ratio</b>            |                                                   |                                                 |                                                                                                       |                                        |                                       |                      |                                        |                                        |                                    |  |
| Intercept:                            | 399.0                                             | 442.6                                           | 388.8                                                                                                 | 418.0                                  | 372.0                                 | 0.10                 | 352.0                                  | 364.4                                  | 0.65                               |  |
| T0: at diagnosis                      | (261.5; 536.5)                                    | (253.6; 631.7)                                  | (242.9; 534.8)                                                                                        | (276.1; 560.0)                         | (230.7; 513.2)                        |                      | (196.9; 507.1)                         | (200.5; 528.2)                         |                                    |  |
| T1: after 2xOEPA                      | -26.5 (-57.1; 4.1),<br>P = 0.09                   | -35.0<br>(-140.4; 70.5),<br>P = 0.51            | 39.9<br>(-40.8; 120.6),<br>P = 0.33                                                                   | -65.2<br>(-112.7; -17.7),<br>P = 0.007 | -12.1<br>(-57.2; 33.1),<br>P = 0.60   | 0.75                 | -31.6<br>(-68.5; 5.3),<br>P = 0.09     | -44.2<br>(-92.5; 4.2),<br>P = 0.07     | 0.96                               |  |
| T1b/T2: after 1x COPDAC/2x (DE)COPDAC | -62.7<br>(-93.6; -31.7),<br>P < 0.001             | -136.4<br>(-243.1; -29.6),<br>P = 0.01          | -47.4<br>(-131.2; 36.4),<br>P = 0.27                                                                  | -80.8<br>(-129.6; -32.0),<br>P = 0.001 | -51.8<br>(-96.8; -6.7),<br>P = 0.02   | 0.66                 | -65.5<br>(-103.5; -27.5),<br>P < 0.001 | -64.1<br>(-111.6; -16.7),<br>P = 0.008 | 0.73                               |  |
| T3: after 4x (DE)COPDAC               | -50.9<br>(-89.9; -12.0),<br>P = 0.01              | -123.9<br>(-247.3; -0.5),<br>P = 0.049          | -                                                                                                     | -                                      | -41.2<br>(-85.0; 2.5),<br>P = 0.07    | -                    | -60.3<br>(-104.9; -15.7),<br>P = 0.008 | -36.4<br>(-95.0; 22.1),<br>P = 0.22    | 0.33                               |  |
| T4: 2yPD                              | -3.0<br>(-37.6; 31.7),<br>P = 0.87                | -134.2<br>(-248.6; -19.9),<br>P = 0.02          | -21.8<br>(-107.0; 63.5),<br>P = 0.62                                                                  | 16.8<br>(-35.9; 69.5),<br>P = 0.53     | -12.9<br>(-60.5; 34.7),<br>P = 0.59   | 0.02                 | -1.7<br>(-42.8; 39.5),<br>P = 0.94     | -10.7<br>(-63.8; 42.4),<br>P = 0.69    | 0.72                               |  |

FSH, follicle-stimulating hormone; COPDAC-28, cyclophosphamide, vincristine, prednisone, and dacarbazine; DECOPDAC-21, doxorubicin, etoposide, cyclophosphamide, vincristine, prednisone, and dacarbazine; TL, treatment level; yPD, years post-diagnosis.

Linear mixed models on FSH, inhibin B levels, and the inhibin B:FSH ratio. Analyses were adjusted for age at time of sampling. Reported estimated effect of all treatment-level and treatment scheme subgroups were calculated using the FSH, inhibin B, or inhibin B:FSH ratio at diagnosis (T0) as intercept in the model. P-values represent the estimated differences between subgroups, using the respective T follow-up as intercept in the model.

More specifically: the numbers presented in columns 'TL1', 'TL2', 'TL3', 'TL2/3 COPDAC-28', and 'TL2/3 DECOPDAC-21' display the observed trend in the respective subgroup of patients over time. A statistically significant result ( $P < 0.05$ ) indicates that, within that specific subgroup, the measured hormone levels are significantly different compared to the baseline level (intercept value, T0 at diagnosis).

The numbers presented in columns 'TL2 vs TL3 (P-value)' and 'COPDAC-28 vs DECOPDAC-21 (P-value)' display the assessed difference between the subgroups at each time point. A P-value  $< 0.05$  indicates a statistically significant difference between the two compared subgroups.
